# Supplementary material
Source: publisher figshare collection journal article supplement (https://acs.figshare.com/ndownloader/files/25756136)
Supplement: Supplementary file 1 [file 25756136]

## Supporting information

### Synthesis of Polyurea Thermoplastics through a Nonisocyanate Route Using CO<sub>2</sub> and Aliphatic Diamines

*Ruhui Shi,<sup>†,‡,§,#</sup> Shan Jiang,<sup>‡,#</sup> Haiyang Cheng,<sup>\*,†,§</sup> Peixuan Wu,<sup>†,‡,§</sup> Chao Zhang,<sup>†,§</sup> Masahiko Arai,<sup>†,§</sup> and Fengyu Zhao<sup>\*,†,‡,§</sup>*

<sup>†</sup> State Key Laboratory of Electroanalytical Chemistry, Changchun Institute of Applied Chemistry, Chinese Academy of Sciences, No. 5625 Renmin Rd., Changchun, 130022, China

E-mail: zhaofy@ciac.ac.cn

E-mail: hycyl@ciac.ac.cn

<sup>‡</sup> University of Science and Technology of China, No. 96 Jinzhai Rd., Hefei, 230026, China

<sup>§</sup> Jilin Province Key Laboratory of Green Chemistry and Process, Changchun Institute of Applied Chemistry, Chinese Academy of Sciences, No. 5625 Renmin Rd., Changchun, 130022, China

<sup>‡</sup> School of Materials Science and Engineering, Shanghai University, Shanghai 200444, P. R. China

<sup>#</sup> R. S. and S. J. contributed equally to this work.

The Supporting Information contains:

Number of Pages: 17

Number of Schemes: 2

Number of Figures: 8

Number of Tables: 6

## Table of Contents

|                                                                                                                                                                                                                                                                                                                                                |     |
|------------------------------------------------------------------------------------------------------------------------------------------------------------------------------------------------------------------------------------------------------------------------------------------------------------------------------------------------|-----|
| Materials.....                                                                                                                                                                                                                                                                                                                                 | S4  |
| Characterization.....                                                                                                                                                                                                                                                                                                                          | S4  |
| Scheme S1. Intermolecular hydrogen bonds formed in PUas of DAD <sub>100</sub> , DAD <sub>50</sub> HMDA <sub>50</sub> ,<br>HMDA <sub>100</sub> .....                                                                                                                                                                                            | S5  |
| Figure S1. FTIR spectra of (a) DAD <sub>100</sub> , (b) DAD <sub>63</sub> HMDA <sub>37</sub> , (c) DAD <sub>50</sub> HMDA <sub>50</sub> , (d)<br>DAD <sub>37</sub> HMDA <sub>63</sub> , (e) HMDA <sub>100</sub> .....                                                                                                                          | S6  |
| Determination of molecular weight of PUas samples.....                                                                                                                                                                                                                                                                                         | S6  |
| Table S1. Calculated number average molecular weight ( $M_n$ ) of PUas and OUas.....                                                                                                                                                                                                                                                           | S7  |
| Figure S2. (A) <sup>13</sup> C NMR spectra of OUas of OUa-DAD <sub>100</sub> (bottom), OUa-DAD <sub>37</sub> HMDA <sub>63</sub><br>(medium) and OUa-HMDA <sub>100</sub> (top). (B) <sup>13</sup> C NMR spectra of PUas of DAD <sub>100</sub><br>(bottom), DAD <sub>37</sub> HMDA <sub>63</sub> (medium) and HMDA <sub>100</sub> (top).....     | S8  |
| Figure S3. Two-dimensional NMR spectra of DAD <sub>37</sub> HMDA <sub>63</sub> . (a) <sup>1</sup> H- <sup>1</sup> H correlation spectroscopy<br>(COSY), (b) H- <sup>13</sup> C heteronuclear multiple bond correlation (HMBC) and (c) <sup>1</sup> H- <sup>13</sup> C<br>heteronuclear single quantum correlation (HSQC).....                  | S9  |
| Figure S4. MALDI-TOF spectra of DAD <sub>37</sub> HMDA <sub>63</sub> soluble in ethanol. “M” is MALDI matrix of<br>2,5-dihydroxybenzoic acid.....                                                                                                                                                                                              | S10 |
| Table S2. Solubility of PUas in several solvents.....                                                                                                                                                                                                                                                                                          | S11 |
| Table S3. Swelling test of PUas in CH <sub>2</sub> Cl <sub>2</sub> and H <sub>2</sub> O.....                                                                                                                                                                                                                                                   | S11 |
| Table S4. Mechanical properties of PUas.....                                                                                                                                                                                                                                                                                                   | S11 |
| Figure S5. First heating DSC scans of PUas. $T_g$ determined is given on the graph. (a) DAD <sub>100</sub> , (b)<br>DAD <sub>63</sub> HMDA <sub>37</sub> , (c) DAD <sub>50</sub> HMDA <sub>50</sub> , (d) DAD <sub>37</sub> HMDA <sub>63</sub> and (e) HMDA <sub>100</sub> .....                                                               | S12 |
| Scheme S2. Intermolecular hydrogen bonding formed in the PUas of DAD <sub>50</sub> DA <sub>450</sub> ,<br>DAD <sub>50</sub> HMDA <sub>50</sub> , DAD <sub>50</sub> DA <sub>850</sub> and DAD <sub>50</sub> DA <sub>1050</sub> .....                                                                                                            | S13 |
| Figure S6. X-ray diffraction patterns of DAD <sub>100</sub> , DAD <sub>50</sub> DA <sub>1050</sub> , DAD <sub>50</sub> DA <sub>850</sub> , DAD <sub>50</sub> HMDA <sub>50</sub><br>and DAD <sub>50</sub> DA <sub>450</sub> .....                                                                                                               | S14 |
| Figure S7. (a) Second heating and (b) cooling DSC scans of DAD <sub>50</sub> DA <sub>450</sub> , DAD <sub>50</sub> HMDA <sub>50</sub> ,<br>DAD <sub>50</sub> DA <sub>850</sub> and DAD <sub>50</sub> DA <sub>1050</sub> .....                                                                                                                  | S14 |
| Table S5. Thermal properties of PUas determined by DSC and TGA.....                                                                                                                                                                                                                                                                            | S15 |
| Figure S8. TGA curves of DAD <sub>50</sub> DA <sub>450</sub> , DAD <sub>50</sub> HMDA <sub>50</sub> , DAD <sub>50</sub> DA <sub>850</sub> and DAD <sub>50</sub> DA <sub>1050</sub> ...                                                                                                                                                         | S15 |
| Table S6. Mechanical properties of the present DAD <sub>37</sub> HMDA <sub>63</sub> and DAD <sub>50</sub> HMDA <sub>50</sub> materials<br>compared with those of the reported CO <sub>2</sub> -based PUas, isocyanate-free<br>polyhydroxyurethanes, CO <sub>2</sub> -based polycarbonates, polyamide 6 and PUas from<br>isocyanate of MDI..... | S16 |

**Materials.** 1,12-Diaminododecane (DAD) was purchased from TCI. 1,10-Diaminodecane (DA10), 1,8-octanediamine (DA8), 1,6-hexamethylene diamine (HMDA) and 1,4-butanediamine (DA4) were purchased from Sanbang Pharmaceutical Technology. Cyclohexane, tetrahydrofuran (THF), dimethylformamide (DMF), *N*-methyl-2-pyrrolidinone (NMP), dimethyl sulfoxide (DMSO), acetone, dichloromethane (CH<sub>2</sub>Cl<sub>2</sub>), methanol (CH<sub>3</sub>OH), acetic acid (CH<sub>3</sub>COOH), and formic acid (HCOOH) were purchased from Beijing Chemical Reagent. Trifluoroethanol (TFE), trifluoroacetic acid (TFA) and hexafluoroisopropanol (HFIP) were purchased from Aladdin Reagent. Hexafluoroisopropanol-D<sub>2</sub> (HFIP-D<sub>2</sub>) was purchased from J&K. All those chemicals were used as received without further purification. Carbon dioxide (CO<sub>2</sub>) and nitrogen (N<sub>2</sub>) with purity of >99.999% were purchased from Changchun JuYang Gas Company. Deionized water (H<sub>2</sub>O) was used.

**Characterization.** Fourier transform infrared (FTIR) spectra were recorded on a Nicolet iS50 FTIR spectrometer using KBr pellet pressing method in a range of 400 to 4000 cm<sup>-1</sup>. <sup>1</sup>H and <sup>13</sup>C NMR were examined on a Bruker AV-400 and HFIP-D<sub>2</sub> was selected as a solvent to dissolve samples for analysis. X-ray diffraction (XRD) was investigated on a Bruker D8 ADVANCE instrument using CuK $\alpha$  radiation from 2 $\theta$  = 10° to 70°. Differential scanning calorimeter (DSC) curves were collected with a PerkinElmer apparatus at a heating/cooling/heating rate of 10 °C/min from -50 to 250 °C or -50 to 300 °C in a continuous N<sub>2</sub> flow. Thermogravimetric analysis (TGA) was performed on the PerkinElmer Thermal instrument at a heating rate of 10 °C/min from 50 to 500 °C under continuous N<sub>2</sub> flow conditions. Mechanical properties, such as tensile strength and Young's modulus, were investigated by a tensile test using an Instron-1121 machine at 25 °C with a crosshead speed of 5 mm/min. Polymer specimens were prepared in a dumbbell shape with a dimension of 30 mm  $\times$  4 mm  $\times$  1.6 mm by the melt-press method according to GB/T 1040-2006 Type 5A standard. For each PUa sample, the data are reported with the average value of at least five different specimens. The solubility was examined according to the same method described previously.<sup>54</sup> Swelling test was performed by immersing the dumbbell shape sample (30 mm  $\times$  4 mm  $\times$  1.6 mm) in CH<sub>2</sub>Cl<sub>2</sub> or H<sub>2</sub>O at 25 °C for 96 h. The swelling capacity in CH<sub>2</sub>Cl<sub>2</sub> or H<sub>2</sub>O was determined by a change in weight before and after the swelling. Matrix-assisted laser desorption and ionization time-of-flight (MALDI-TOF) mass spectra were collected on Bruker Autoflex III mass spectrometer equipped with a 355 nm Nd : YAG laser with a 5 ns pulse duration in positive ion mode and 2,5-dihydroxybenzoic acid (2,5-DHB) was selected as the matrix. The solid powder of DAD<sub>37</sub>HMDA<sub>63</sub> was dispersed in ethanol, ultrasound for 2 h and then kept with no ultrasound for 24 h. The resulting sample dissolved in ethanol was examined by MALDI-TOF.

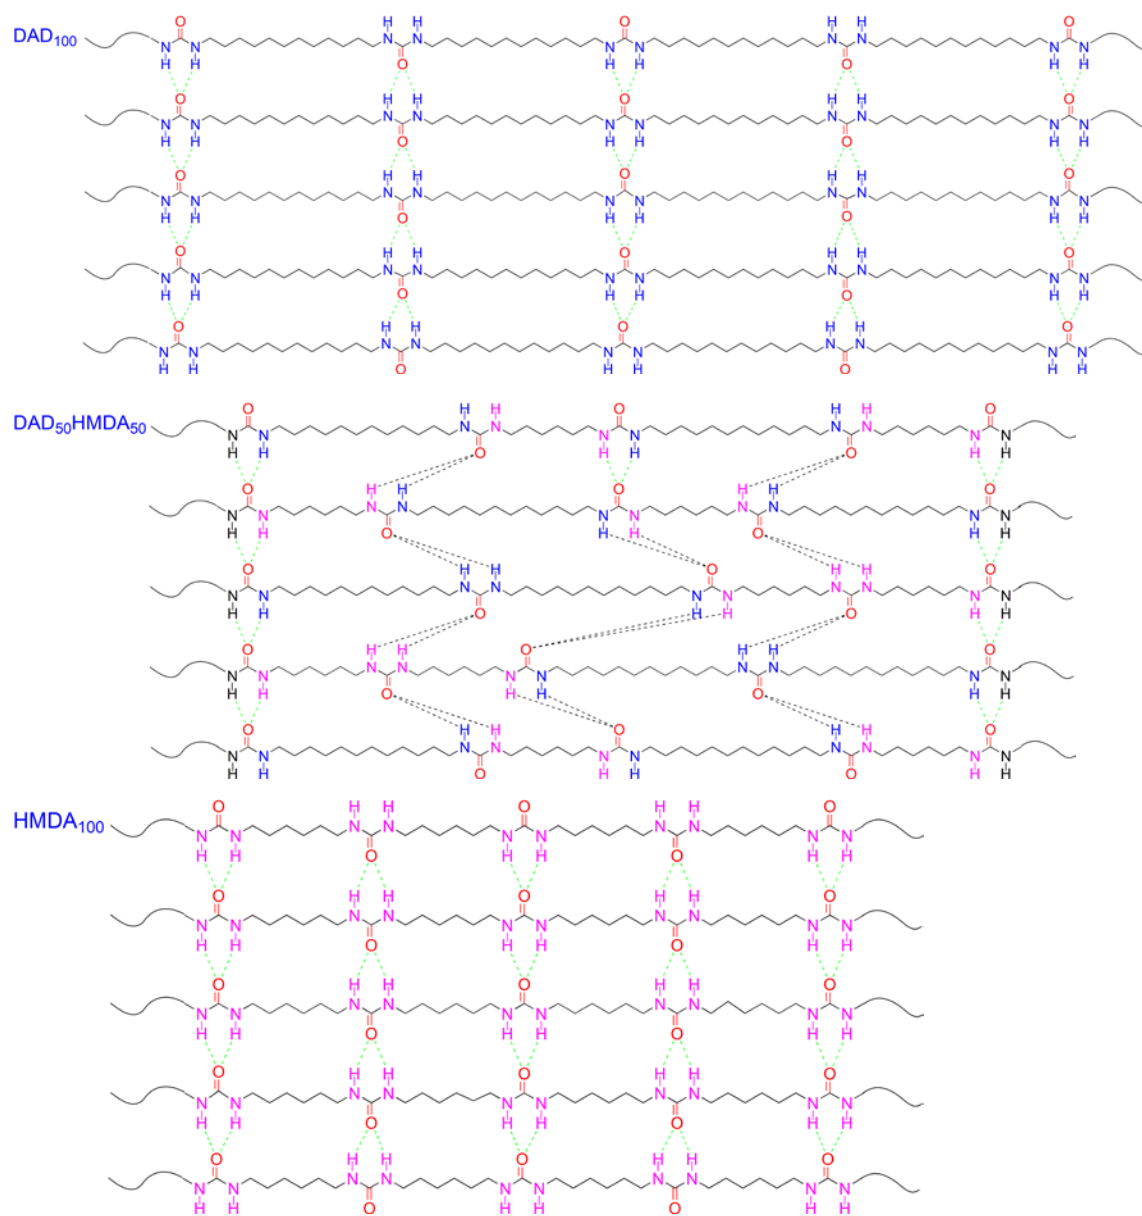

**Scheme S1.** Intermolecular hydrogen bonds formed in PUAs of DAD<sub>100</sub>, DAD<sub>50</sub>HMDA<sub>50</sub>, HMDA<sub>100</sub>.

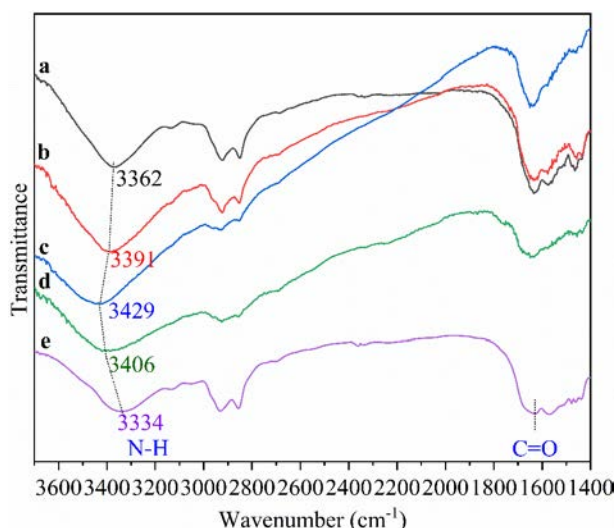

**Figure S1.** FTIR spectra of (a) DAD<sub>100</sub>, (b) DAD<sub>63</sub>HMDA<sub>37</sub>, (c) DAD<sub>50</sub>HMDA<sub>50</sub>, (d) DAD<sub>37</sub>HMDA<sub>63</sub>, (e) HMDA<sub>100</sub>.

### Determination of molecular weight of PUas samples

The number average molecular weight ( $M_n$ ) of DAD<sub>100</sub> and HMDA<sub>100</sub> were calculated from the <sup>1</sup>H NMR data with the following equations according to the literature <sup>1,2</sup>. The NMR data used and the calculation results are presented later (Figure 2, Table S1). The hydrogen in the  $\alpha$  C-position to the terminal amino group is overlapped with that in the  $\alpha$  C-position to the nitrogen of the urea linkage, so the hydrogen in the  $\beta$  C-position to the terminal amino group and the  $\beta$  C-position to the nitrogen of the urea linkage were used as below scheme and equations S1, S2.

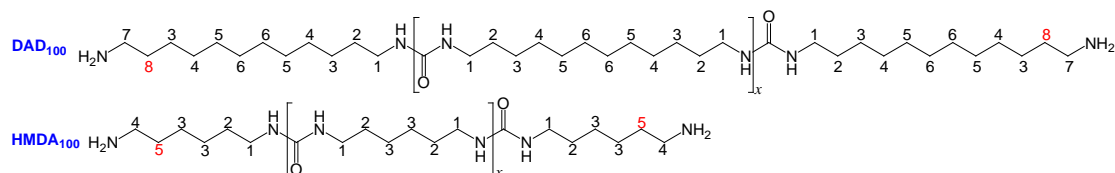

$$(4x + 4) / 4 = I_{CH_2CH_2NH} / I_{CH_2CH_2NH_2 \text{ (chain-ends)}} \quad \text{Eq. S1}$$

$$M_n = M_{\text{repeating-unit}} \times x + M_{\text{chain-ends-1}} + M_{\text{chain-ends-2}} \quad \text{Eq. S2}$$

where:

$x$  is the number of repeating unit.  $4x + 4$  is the number of hydrogen in the  $\beta$  C-position to the nitrogen of the urea linkage. 4 is the number of hydrogen in  $\beta$  C-position to the terminal amino group.

$I_{CH_2CH_2NH}$  is the relative integration of the peaks arising from protons in  $\beta$  C-position to the nitrogen of the urea linkage for peak 2 in Figure 2a (DAD<sub>100</sub>) and for peak 2 in Figure 2c (HMDA<sub>100</sub>).

$I_{CH_2CH_2NH_2 \text{ (chain-ends)}}$  is the relative integration of the peaks arising from protons in  $\beta$  C-position to the terminal amino group for peak 8 in Figure 2a (DAD<sub>100</sub>) and for peak 5 in Figure 2c (HMDA<sub>100</sub>).

$M_{\text{repeating-unit}}$  is the molecular weight of the repeating unit (226.4 g/mol for DAD<sub>100</sub>; 142.2 g/mol for HMDA<sub>100</sub>).

$M_{\text{chain-ends-1}}$  is one of the molecular weight of the chain-ends (199.4 g/mol for DAD<sub>100</sub>; 115.2 g/mol for HMDA<sub>100</sub>).

$M_{chain-ends-2}$  is the other of the molecular weight of the chain-ends (227.4 g/mol for DAD<sub>100</sub>; 143.2 g/mol for HMDA<sub>100</sub>).

We assume that one end of the chain is the DAD segment and the other end of the chain is the HMDA segment as below described.

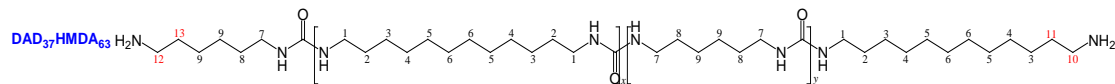

The number average molecular weight ( $M_n$ ) of DAD<sub>37</sub>HMDA<sub>63</sub> was calculated from the <sup>1</sup>H NMR data with the following equations S3-5:

$$(4x + 4y + 4)/4 = (I_{CH_2CH_2NH-DAD} + I_{CH_2CH_2NH-HMDA}) / (I_{CH_2CH_2NH_2 (chain-ends)-DAD} + I_{CH_2CH_2NH_2 (chain-ends)-HMDA}) \quad \text{Eq. S3}$$

$$x / y = 37 / 63 \quad \text{Eq. S4}$$

$$M_n = M_{repeating-unit-DAD} \times x + M_{repeating-unit-HMDA} \times y + M_{chain-ends-1} + M_{chain-ends-2} \quad \text{Eq. S5}$$

where:

$x$  and  $y$  are the numbers of repeating unit in DAD and HMDA segment, respectively.  $4x + 4y + 4$  is the number of hydrogen in  $\beta$  C-position to the nitrogen of the urea linkage in DAD and HMDA segments. 4 is the number of hydrogen in  $\beta$  C-position to the terminal amino groups.

$I_{CH_2CH_2NH-DAD}$  and  $I_{CH_2CH_2NH-HMDA}$  are the relative integrations of the peaks arising from protons in  $\beta$  C-position to the nitrogen of the urea linkage in the DAD and HMDA segments (peak 2 and peak 8 in Figure 2b), respectively.

$I_{CH_2CH_2NH_2 (chain-ends)-DAD}$  and  $I_{CH_2CH_2NH_2 (chain-ends)-HMDA}$  are the relative integrations of the peaks arising from protons in  $\beta$  C-position to the terminal amino group in the DAD and HMDA segments (peak 11 and peak 13 in Figure 2b), respectively.

$M_{repeating-unit-DAD}$  and  $M_{repeating-unit-HMDA}$  are the molecular weights of the repeating unit in DAD (226.4 g/mol) and HMDA (142.2 g/mol) segments, respectively.

$M_{chain-ends-1}$  and  $M_{chain-ends-2}$  are the molecular weights of the chain-ends, one end of the chain is the DAD segment and the other end of the chain is the HMDA segment as illustrated in the above Scheme, the molecular weight of the chain-ends are 199.4 and 143.2 g/mol, respectively.

The number average molecular weights ( $M_n$ ) so calculated are listed in Table S1.

**Table S1.** Calculated number average molecular weight ( $M_n$ ) of PUas and OUas

| Entry | Sample                                   | $M_n$ (g/mol) |
|-------|------------------------------------------|---------------|
| 1     | DAD <sub>100</sub>                       | 3553          |
| 2     | DAD <sub>37</sub> HMDA <sub>63</sub>     | 4534          |
| 3     | HMDA <sub>100</sub>                      | 1656          |
| 4     | OUa-DAD <sub>100</sub>                   | 823           |
| 5     | OUa-DAD <sub>37</sub> HMDA <sub>63</sub> | 726           |
| 6     | OUa-HMDA <sub>100</sub>                  | 325           |

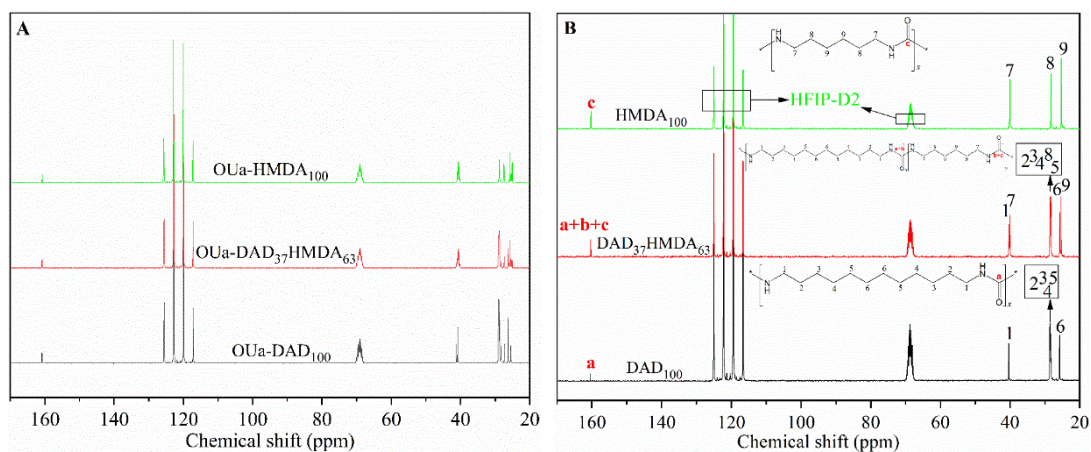

**Figure S2.** (A)  $^{13}\text{C}$  NMR spectra of OUas of OUa-DAD<sub>100</sub> (bottom), OUa-DAD<sub>37</sub>HMDA<sub>63</sub> (medium) and OUa-HMDA<sub>100</sub> (top). (B)  $^{13}\text{C}$  NMR spectra of PUas of DAD<sub>100</sub> (bottom), DAD<sub>37</sub>HMDA<sub>63</sub> (medium) and HMDA<sub>100</sub> (top).



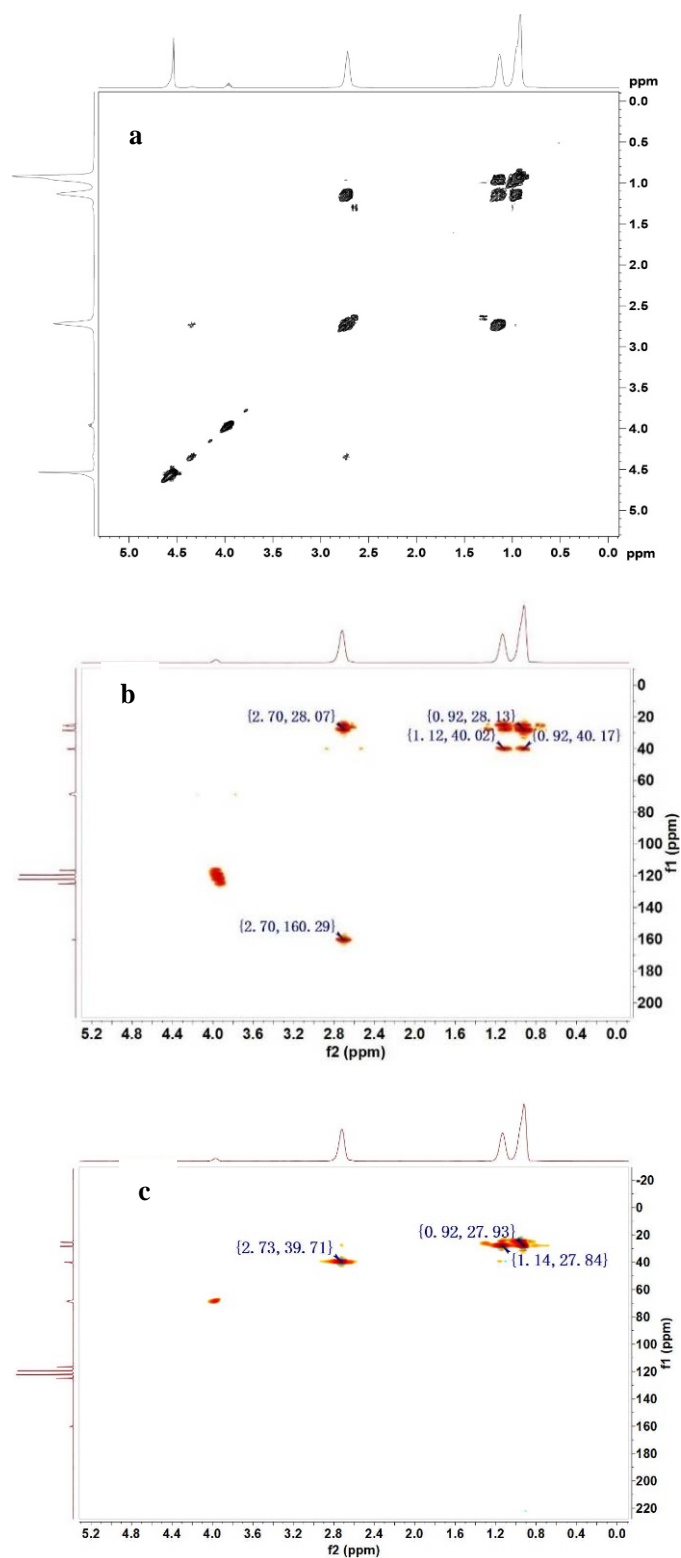

**Figure S3.** Two-dimensional NMR spectra of DAD<sub>37</sub>HMDA<sub>63</sub>. (a) <sup>1</sup>H-<sup>1</sup>H correlation spectroscopy (COSY), (b) <sup>1</sup>H-<sup>13</sup>C heteronuclear multiple bond correlation (HMBC) and (c) <sup>1</sup>H-<sup>13</sup>C heteronuclear single quantum correlation (HSQC).

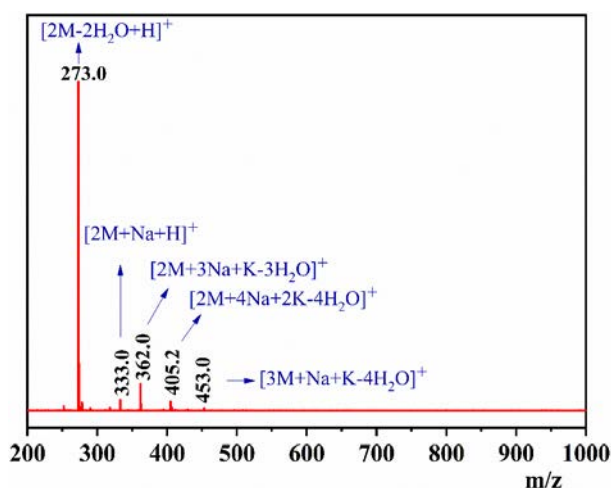

**Figure S4.** MALDI-TOF spectra of DAD<sub>37</sub>HMDA<sub>63</sub> soluble in ethanol. “M” is MALDI matrix of 2,5-dihydroxybenzoic acid.

Matrix-assisted laser desorption and ionization time-of-flight (MALDI-TOF) mass spectra were collected on Bruker Autoflex III mass spectrometer equipped with a 355 nm Nd : YAG laser with a 5 ns pulse duration in positive ion mode and 2,5-dihydroxybenzoic acid (2,5-DHB) was selected as the matrix. The solid powder of DAD<sub>37</sub>HMDA<sub>63</sub> was dispersed in ethanol, kept in a bath sonicator for 2 h, and then kept with no sonication for 24 h at room temperature. After centrifugation, a solid sample was obtained and dried at 120 °C, the mass of solid sample changed slightly before and after dissolving in ethanol. The sample dissolved in ethanol was examined by MALDI-TOF in the reflection mode with an acceleration voltage of 20 kV over the m/z 200-3000. There were neither monomers of DAD nor oligomers of DAD<sub>37</sub>HMDA<sub>63</sub>, and a series of ion peaks of MALDI matrix were observed (**Figure S4**), indicating that DAD and HMDA were completely polymerized into DAD<sub>37</sub>HMDA<sub>63</sub>.

**Table S2.** Solubility of PUAs in several solvents

| Solvent                         | $\alpha$ <sup>a</sup> | Sample <sup>b</sup> |                                         |                                         |                                         |                     |
|---------------------------------|-----------------------|---------------------|-----------------------------------------|-----------------------------------------|-----------------------------------------|---------------------|
|                                 |                       | DAD <sub>100</sub>  | DAD <sub>63</sub><br>HMDA <sub>37</sub> | DAD <sub>50</sub><br>HMDA <sub>50</sub> | DAD <sub>37</sub><br>HMDA <sub>63</sub> | HMDA <sub>100</sub> |
| Cyclohexane                     | 0                     | --                  | --                                      | --                                      | --                                      | --                  |
| THF                             | 0                     | --                  | --                                      | --                                      | --                                      | --                  |
| DMF                             | 0                     | --                  | --                                      | --                                      | --                                      | --                  |
| NMP                             | 0                     | --                  | --                                      | --                                      | --                                      | --                  |
| DMSO                            | 0                     | --                  | --                                      | --                                      | --                                      | --                  |
| Acetone                         | 0.08                  | --                  | --                                      | --                                      | --                                      | --                  |
| CH <sub>2</sub> Cl <sub>2</sub> | 0.13                  | --                  | --                                      | --                                      | --                                      | --                  |
| CH <sub>3</sub> OH              | 0.98                  | --                  | --                                      | --                                      | --                                      | --                  |
| CH <sub>3</sub> COOH            | 1.12                  | --                  | --                                      | --                                      | --                                      | --                  |
| H <sub>2</sub> O                | 1.17                  | --                  | --                                      | --                                      | --                                      | --                  |
| HCOOH                           | 1.23                  | --                  | --                                      | --                                      | --                                      | --                  |
| TFE                             | 1.51                  | --                  | --                                      | --                                      | --                                      | --                  |
| TFA                             | -- <sup>c</sup>       | -- <sup>d</sup>     | -- <sup>d</sup>                         | -- <sup>d</sup>                         | -- <sup>d</sup>                         | -- <sup>d</sup>     |
| HFIP                            | 1.96                  | +                   | +                                       | +                                       | +                                       | +                   |

<sup>a</sup>  $\alpha$  is the hydrogen bond donation (HBD) ability of solvent<sup>3</sup>. <sup>b</sup> “+”: soluble (> 1 g polyurea/100 g solvent), “--”: insoluble (< 1 g polyurea/100 g solvent). <sup>c</sup> The  $\alpha$  value of TFA is unknown, but should be a little larger than that of TFE. <sup>d</sup> insoluble but melted. THF: tetrahydrofuran, DMF: dimethylformamide, NMP: *N*-methyl-2-pyrrolidinone, DMSO: dimethyl sulfoxide, TFE: trifluoroethanol, TFA: trifluoroacetic acid, HFIP: hexafluoroisopropanol.

**Table S3.** Swelling test of PUAs in CH<sub>2</sub>Cl<sub>2</sub> and H<sub>2</sub>O

| Sample                               | Mass increase (%) <sup>a</sup>  |                  |
|--------------------------------------|---------------------------------|------------------|
|                                      | CH <sub>2</sub> Cl <sub>2</sub> | H <sub>2</sub> O |
| DAD <sub>50</sub> TTD <sub>50</sub>  | 26%                             | 7.4%             |
| DAD <sub>50</sub> HMDA <sub>50</sub> | 24%                             | 0.6%             |
| DAD <sub>37</sub> HMDA <sub>63</sub> | 24%                             | 0.6%             |

<sup>a</sup> The mass increase was measured in 96 h on the immersion of PUAs dumbbell shape sample in the solvents.

**Table S4.** Mechanical properties of PUAs

| Sample                               | Modulus (MPa) | Tensile strength (MPa) | Elongation at break (%) |
|--------------------------------------|---------------|------------------------|-------------------------|
| DAD <sub>100</sub>                   | 1170 ± 46     | 53.3 ± 5.0             | 13 ± 6                  |
| DAD <sub>63</sub> HMDA <sub>37</sub> | 780 ± 14      | 55.2 ± 1.5             | 260 ± 10                |
| DAD <sub>50</sub> HMDA <sub>50</sub> | 918 ± 36      | 62.1 ± 6.2             | 267 ± 42                |
| DAD <sub>37</sub> HMDA <sub>63</sub> | 1247 ± 147    | 63.2 ± 1.5             | 54 ± 12                 |
| HMDA <sub>100</sub>                  | 1194 ± 45     | 18.3 ± 0.4             | 1.6 ± 0.7               |
| DAD <sub>50</sub> DA10 <sub>50</sub> | 951 ± 8       | 42.3 ± 0.2             | 60 ± 13                 |
| DAD <sub>50</sub> DA8 <sub>50</sub>  | 718 ± 98      | 38.8 ± 1.4             | 167 ± 35                |
| DAD <sub>50</sub> DA4 <sub>50</sub>  | 1163 ± 68     | 42.4 ± 0.6             | 5.5 ± 0.6               |

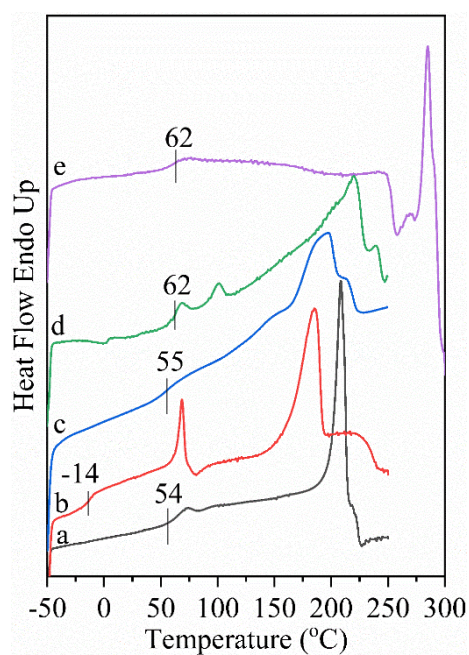

**Figure S5.** First heating DSC scans of PUAs.  $T_g$  determined is given on the graph. (a) DAD<sub>100</sub>, (b) DAD<sub>63</sub>HMDA<sub>37</sub>, (c) DAD<sub>50</sub>HMDA<sub>50</sub>, (d) DAD<sub>37</sub>HMDA<sub>63</sub> and (e) HMDA<sub>100</sub>.

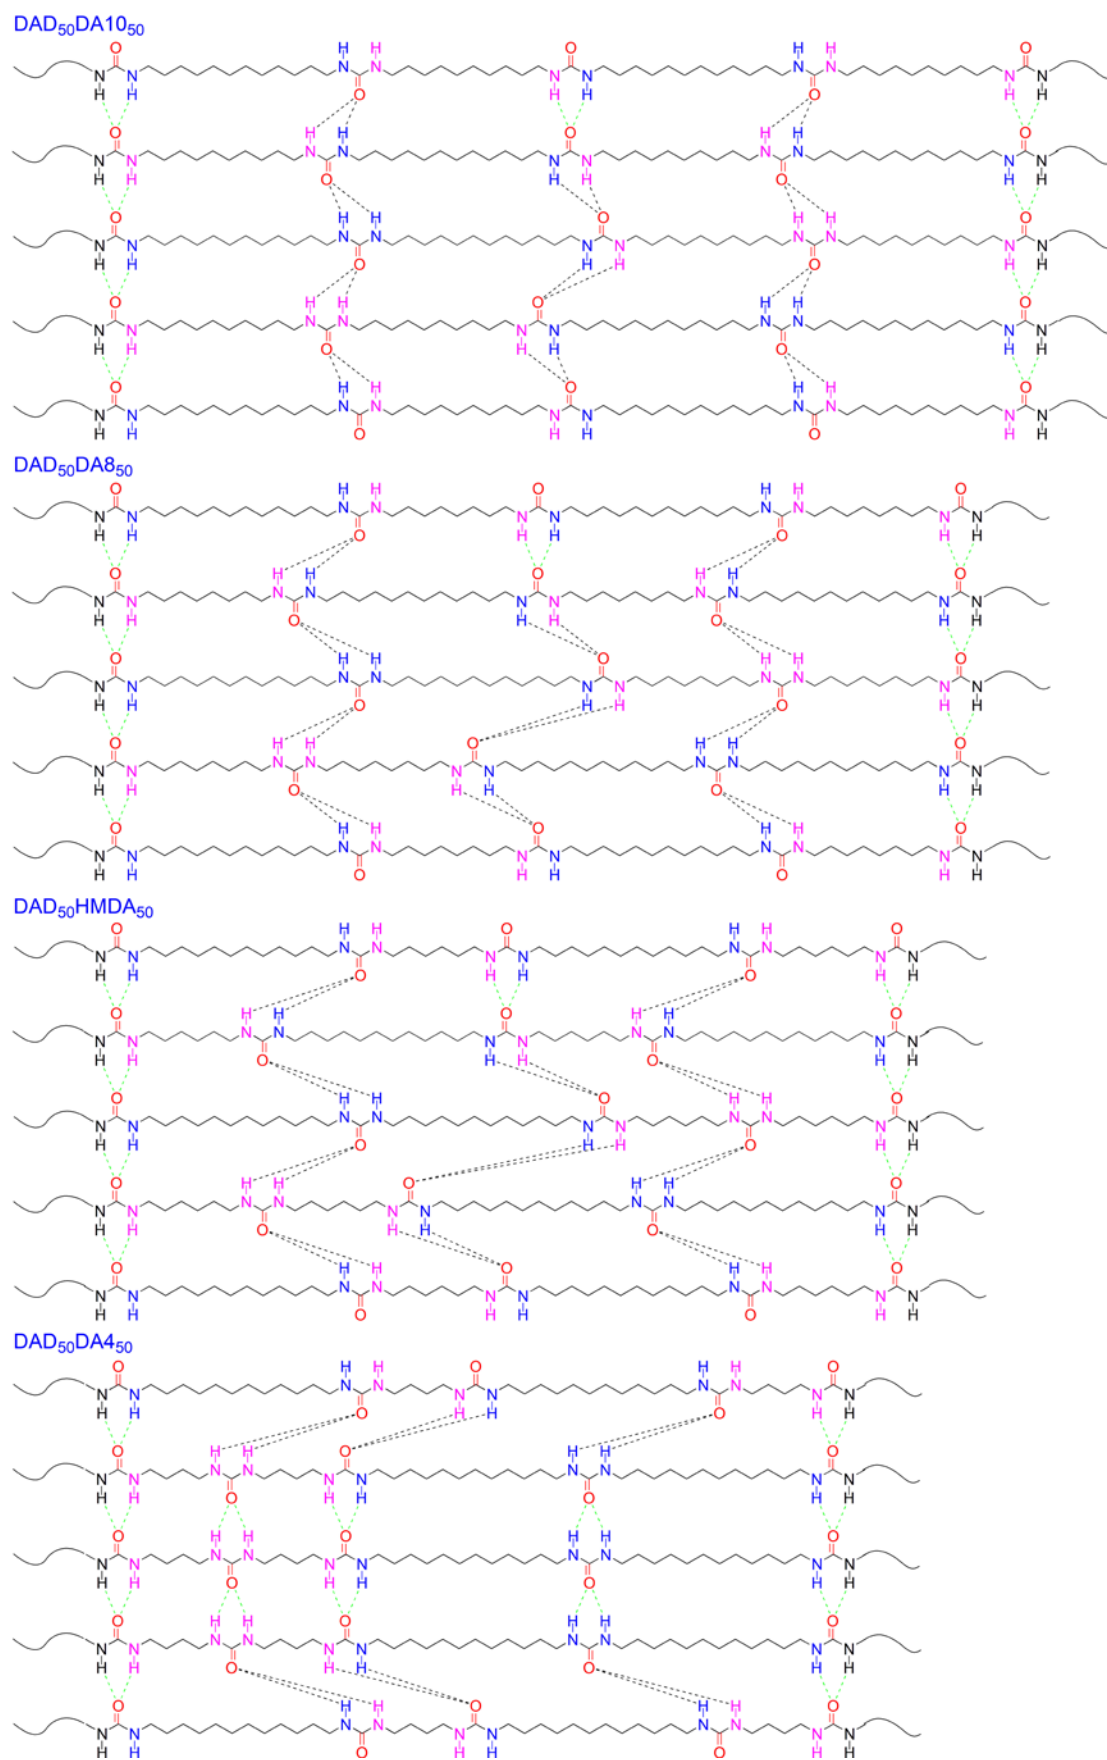

**Scheme S2.** Intermolecular hydrogen bonding formed in the PUAs of DAD<sub>50</sub>DA4<sub>50</sub>, DAD<sub>50</sub>HMDA<sub>50</sub>, DAD<sub>50</sub>DA8<sub>50</sub> and DAD<sub>50</sub>DA10<sub>50</sub>.

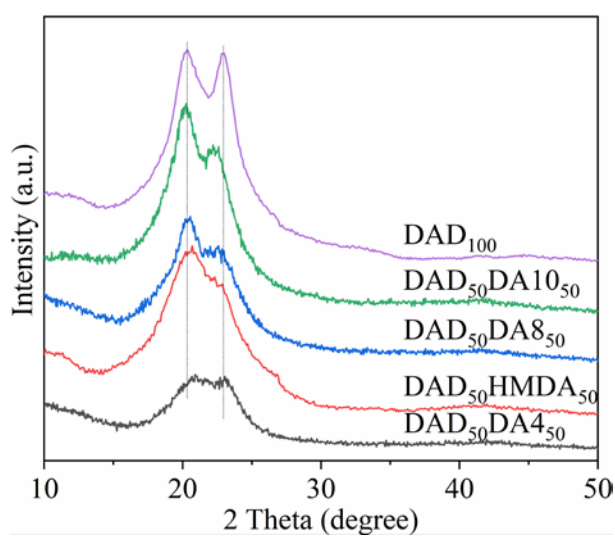

**Figure S6.** X-ray diffraction patterns of DAD<sub>100</sub>, DAD<sub>50</sub>DA<sub>10</sub><sub>50</sub>, DAD<sub>50</sub>DA<sub>8</sub><sub>50</sub>, DAD<sub>50</sub>HMDA<sub>50</sub> and DAD<sub>50</sub>DA<sub>4</sub><sub>50</sub>.

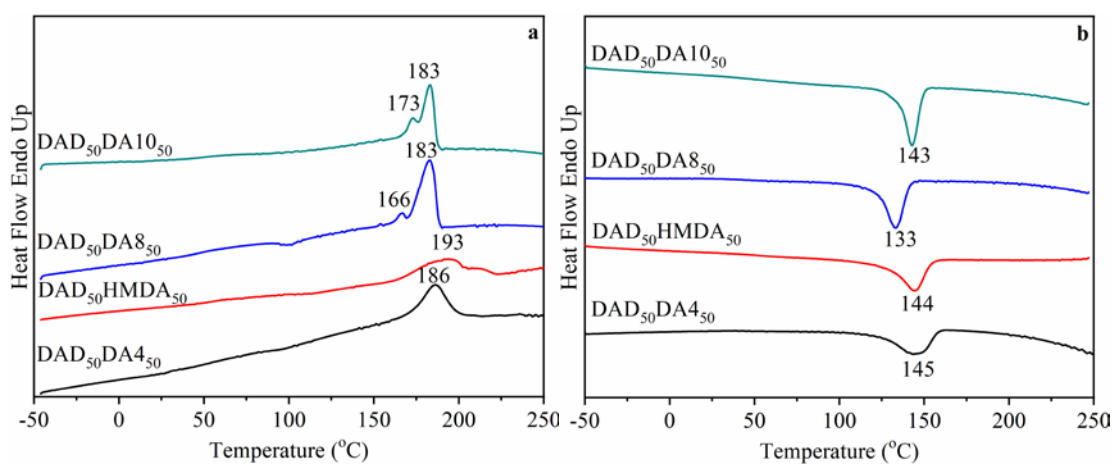

**Figure S7.** (a) Second heating and (b) cooling DSC scans of DAD<sub>50</sub>DA<sub>4</sub><sub>50</sub>, DAD<sub>50</sub>HMDA<sub>50</sub>, DAD<sub>50</sub>DA<sub>8</sub><sub>50</sub> and DAD<sub>50</sub>DA<sub>10</sub><sub>50</sub>.

**Table S5.** Thermal properties of PUAs determined by DSC and TGA

| Entry | Sample                               | DSC <sup>a</sup> | DSC <sup>b</sup>              |                               |                            |                     |                                    | $\Delta H_{m,100\%}$<br>(J/g) <sup>f</sup> | $X_c$<br>(%) <sup>g</sup> | TGA                 |
|-------|--------------------------------------|------------------|-------------------------------|-------------------------------|----------------------------|---------------------|------------------------------------|--------------------------------------------|---------------------------|---------------------|
|       |                                      | $T_g$<br>(°C)    | $T_{m1}$<br>(°C) <sup>c</sup> | $T_{m2}$<br>(°C) <sup>c</sup> | $T_c$<br>(°C) <sup>c</sup> | $T_{d,5\%}$<br>(°C) | $\Delta H_c$<br>(J/g) <sup>e</sup> |                                            |                           | $T_{d,5\%}$<br>(°C) |
| 1     | DAD <sub>100</sub>                   | 54               | 207                           | --                            | 181                        | 79                  | 69                                 | 230                                        | 34                        | 327                 |
| 2     | DAD <sub>50</sub> DA10 <sub>50</sub> | 57               | 173                           | 183                           | 143                        | 57                  | 48                                 | 225                                        | 25                        | 298                 |
| 3     | DAD <sub>50</sub> DA8 <sub>50</sub>  | 43               | 166                           | 183                           | 133                        | 43                  | 46                                 | 221                                        | 20                        | 328                 |
| 4     | DAD <sub>50</sub> HMDA <sub>50</sub> | 55               | 193                           | --                            | 144                        | 39                  | 44                                 | 217                                        | 18                        | 324                 |
| 5     | DAD <sub>50</sub> DA4 <sub>50</sub>  | 58               | 186                           | --                            | 145                        | 59                  | 38                                 | 212                                        | 28                        | 292                 |

<sup>a</sup> Heating/cooling/heating thermal cycles of 10 °C/min, values determined from the first heating scans. <sup>b</sup> values determined from cooling and second heating scans. <sup>c</sup>  $T_{m1}$ ,  $T_{m2}$  and  $T_c$  are measured as the peak temperature in the endotherm and exotherm, respectively. <sup>d</sup>  $\Delta H_m$  determined as area under the endothermic event. <sup>e</sup>  $\Delta H_c$  determined as area under the exothermic event. <sup>f</sup>  $\Delta H_{m,100\%}$  is the fusion enthalpy of a 100% crystalline sample estimated by group contribution theory,<sup>4</sup> which could be estimated according to the group contribution in proportion to their relative amounts.<sup>5,6</sup> <sup>g</sup> The degree of crystallinity ( $X_c$ ),  $X_c = [(\Delta H_m - \Delta H_{cc})/\Delta H_{m,100\%}]$ ; where  $(\Delta H_m - \Delta H_{cc})$  is the melting enthalpy of the component under consideration.  $\Delta H_{cc}$  determined as area under the exothermic event during heating sweep (cold crystallization), the value is 0.

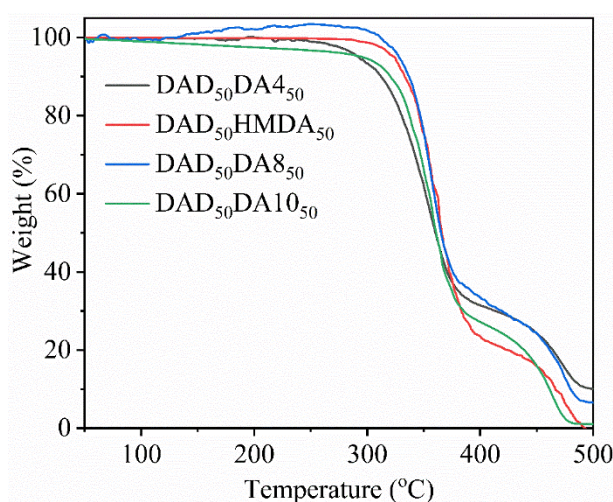**Figure S8.** TGA curves of DAD<sub>50</sub>DA4<sub>50</sub>, DAD<sub>50</sub>HMDA<sub>50</sub>, DAD<sub>50</sub>DA8<sub>50</sub> and DAD<sub>50</sub>DA10<sub>50</sub>.

**Table S6.** Mechanical properties of the present DAD<sub>37</sub>HMDA<sub>63</sub> and DAD<sub>50</sub>HMDA<sub>50</sub> materials compared with those of the reported CO<sub>2</sub>-based PUAs, isocyanate-free polyhydroxyurethanes, CO<sub>2</sub>-based polycarbonates, polyamide 6 and PUAs from isocyanate of MDI

| Polymers                                       | Sample                                  | Young's modulus (MPa) | Tensile strength (MPa) | Elongation at break (%) | Ref.                   |
|------------------------------------------------|-----------------------------------------|-----------------------|------------------------|-------------------------|------------------------|
| CO <sub>2</sub> -based PUAs                    | DAD <sub>37</sub> HMDA <sub>63</sub>    | 1247±147              | 63.2±1.5               | 54±12                   | This work <sup>6</sup> |
|                                                | DAD <sub>50</sub> HMDA <sub>50</sub>    | 918±36                | 62.1±6.2               | 267±42                  |                        |
|                                                | DAD <sub>50</sub> TTD <sub>50</sub>     | 406±11                | 42.9±2.8               | 330±40                  |                        |
|                                                | DAD <sub>90</sub> EDR-104 <sub>10</sub> | 1190±50               | 57.4±0.6               | 71±6                    |                        |
| Non-isocyanate polyhydroxyurethane             | NIPU-DETA-3                             | 124.1±5.5             | 16.0±0.8               | 98.3±8.6                | 7                      |
|                                                | GGC/POSS-GC/HMDA                        | 639±8                 | 26.6±1.3               | 32±9                    | 8                      |
|                                                | PA <sub>12</sub> HU-PTMO25              | 94.2±24.5             | 5.7±0.4                | 25±8                    | 9                      |
|                                                | BDC/DFS-1,6-AA_IPDA_2                   | 300±40                | --                     | 40±40                   | 10                     |
| CO <sub>2</sub> -based polycarbonate           | PLimC                                   | 950                   | 55                     | 15                      | 11                     |
|                                                | PPC                                     | 1122±55               | 43±2                   | 13.5±1.5                | 12                     |
| Polyamide 6                                    | --                                      | 580                   | 22                     | 12                      | 13                     |
| Traditional PUAs from diisocyanate and diamine | MDI/m-PDA                               | 1389                  | 74.1                   | 13.9                    | 14                     |
|                                                | MDI/HDA                                 | 371                   | 12.0                   | 2.9                     |                        |

#### References

- (1) Kebir, N.; Benoit, M.; Legrand, C.; Burel, F. Non-Isocyanate Thermoplastic Polyureas (NIPUreas) through a Methyl Carbamate Metathesis Polymerization. *Eur. Poly. J.* **2017**, *96*, 87-96, 10.1016/j.eurpolymj.2017.08.046.
- (2) Wu, P. X.; Cheng, H. Y.; Shi, R. H.; Jiang, S.; Wu, Q. F.; Zhang, C.; Arai, M.; Zhao, F. Y. Synthesis of Polyurea via the Addition of Carbon Dioxide to a Diamine Catalyzed by Organic and Inorganic Bases. *Adv. Synth. Catal.* **2019**, *361*, 317-325, 10.1002/adsc.201801134.
- (3) Marcus, Y. The Properties of Organic Liquids that Are Relevant to Their Use as Solvating Solvents. *Chem. Soc. Rev.* **1993**, *22*, 409-416. 10.1039/cs9932200409
- (4) van Krevelen, D. W.; te Nijenhuis, K.: *Properties of Polymers: Their Correlation with Chemical Structure, Their Numerical Estimation and Prediction from Additive Group Contributions*; Elsevier, Amsterdam, The Netherlands, 4th edn, 2009. Chapter 5, p122, 10.1016/B978-0-08-054819-7.00005-4.
- (5) Dennis, J. M.; Steinberg, L. I.; Pekkanen, A. M.; Maiz, J.; Hegde, M.; Muller, A. J.; Long, T. E. Synthesis and Characterization of Isocyanate-Free Polyureas. *Green Chem.* **2018**, *20*, 243-249, 10.1039/c7gc02996a.
- (6) Jiang, S.; Cheng, H. Y.; Shi, R. H.; Wu, P. X.; Lin, W. W.; Zhang, C.; Arai, M.; Zhao, F. Y. Direct Synthesis of Polyurea Thermoplastics from CO<sub>2</sub> and Diamines. *ACS Appl. Mater. Interfaces* **2019**, *11*, 47413-47421, 10.1021/acsami.9b17677.
- (7) Ke, J. X.; Li, X. Y.; Wang, F.; Jiang, S. A.; Kang, M. Q.; Wang, J. W.; Li, Q. F.; Wang, Z. J. Non-isocyanate Polyurethane/epoxy Hybrid Materials with Different and Controlled Architectures Prepared from a CO<sub>2</sub>-sourced Monomer and Epoxy via an



- Environmentally-friendly Route. *RSC Adv.* **2017**, 7, 28841-28852, 10.1039/c7ra04215a.
- (8) Blattmann, H.; Muelhaupt, R. Multifunctional POSS Cyclic Carbonates and Non-Isocyanate Polyhydroxyurethane Hybrid Materials. *Macromolecules* **2016**, 49, 742-751, 10.1021/acs.macromol.5b02560.
  - (9) Leitsch, E. K.; Beniah, G.; Liu, K.; Lan, T.; Heath, W. H.; Scheidt, K. A.; Torkelson, J. M. Nonisocyanate Thermoplastic Polyhydroxyurethane Elastomers via Cyclic Carbonate Aminolysis: Critical Role of Hydroxyl Groups in Controlling Nanophase Separation. *ACS Macro Lett.* **2016**, 5, 424-429, 10.1021/acsmacrolett.6b00102.
  - (10) Schmidt, S.; Gatti, F. J.; Luitz, M.; Ritter, B. S.; Bruchmann, B.; Muelhaupt, R. Erythritol Dicarboxylate as Intermediate for Solvent- and Isocyanate-Free Tailoring of Bio-Based Polyhydroxyurethane Thermoplastics and Thermoplastic Elastomers. *Macromolecules* **2017**, 50, 2296-2303, 10.1021/acs.macromol.6b02787.
  - (11) Hauenstein, O.; Agarwal, S.; Greiner, A. Bio-based Polycarbonate as Synthetic Toolbox. *Nat. Commun.* **2016**, 7, 11862, 10.1038/ncomms11862.
  - (12) Chen, L. J.; Qin, Y. S.; Wang, X. H.; Zhao, X. J.; Wang, F. S. Plasticizing while Toughening and Reinforcing Poly(propylene carbonate) using Low Molecular Weight Urethane: Role of Hydrogen-bonding Interaction. *Polymer* **2011**, 52, 4873-4880, 10.1016/j.polymer.2011.08.025.
  - (13) Xu, Q.; Zhang, N.; He, D.; Liu, Z.; Li, W.; He, W. Preparation of Polyamide 6/Copper Nanocomposites and Its Properties. *Rev. Roum. Chim.* **2019**, 64, 479-484, 10.33224/rrch/2019.64.6.02.
  - (14) Li, X. L.; Chen, D. J. Synthesis and Characterization of Aromatic/Aliphatic Co-polyureas. *J. Appl. Polym. Sci.* **2008**, 109, 897-902.
